# Supplementary material
Source: Elsevier journal article supplement (https://www.sciencedirect.com/science/article/pii/S2531043719301783)
Supplement: mmc1 [file S2531043719301783:mmc1.docx]

Figure 1 – “Pulmonary alveolar proteinosis – imaging. Chest CT showing diffuse ground-glass areas with juxtaposition of healthy zones and thickening of the interlobular septa - *crazy-paving”*

Figure 2 – “Left whole lung lavage – procedure and fluid collected. (A) Patient is intubated with a double-lumen endotracheal tube in a right lateral decubitus position; 1L of warmed saline is being instilled and subsequently collected by gravity after opening the outflow tube. Mechanical chest percussion is improving drainage. (B) From left to the right: from the 1st to the 8th litre to be instilled and collected; the fluid becomes less opaque”
